# Supplementary material for: Characterization of CTNND2-related neurodevelopmental disease, phenotype-genotype spectrum and WNT dynamics in early neurogenesis
Source: Research Square preprint supplement (doi:10.21203/rs.3.rs-8224288/v1), 2025-12-30
Supplement: Supplementary file 1 [file 4627d0779ed39e1bfbc307bd.xlsx]

## Sheet: Table S1. Clinical info
Table S1: Detailed clinical information
Group		Columbia University Medical Center, USA, Halie May, Catherine Kentros, Mythily Ganapathi, Wendy Chung	Toulouse Hospital, France, Sophie JULIA, Guillaume BANNEAU	Children's Mercy Hospital, Kansas City, USA; Emily Farrow & Isabelle Thiffault	Children's Mercy Hospital, Kansas City, USA; Joseph T Alaimo & Vitoria K Paolillo	HudsonAlpha, USA, Susan Hiatt	Cincinnati Children’s Hospital, USA, Ame Shillington		Department of Human Genetic, HanNover Medical School, Germany, HanNover, Germany. Alisa Förster, Lisa Olfe		Service de médecine Génomique des Maladies rares, Hopitla Necker, Hamza Hadj Abdallah, Thomas Courtin	Praticien hospitalier Laboratoire de génétique moléculaire CHU de Nantes, Benjamin Cogne, Service de génétique médicale CHU de Nantes, Sandra Mercier, Benjamin Cogné		Service de génétique médicale, CHU de Limoges, France, Benjamin Dauriat	VUMC, Netherlands, Quinten Waisfisz, Annet van Hagen	Children's Mercy Hospital, Kansas City, USA, Isabelle Thiffault & Florencia Del Viso	Centre de Génétique Humaine, CHU Besançon, Camille Engel, Eric Dahlen		University of Iowa, USA, John Bernat	Children's Mercy Hospital, Kansas City, USA; Ana Cohen & Carol J Saunders	Department of Medical Genetics, University of Alberta, Canada, Anastasia Ambrose, Saadet Ambrose	Univeristy of ToriNo Department of Medical Genetics, Biljana Gagachovska, Slavica Trajkova	Centre de génétique humaine, CHU Besançon, Université de Bourgogne Franche-Comté, Besançon, France, Elise Brischoux-Boucher			Oslo University Hospital, Asbjørg Stray-Pedersen	Childrens Hospital of Philadelphia, Philadelphia, Emma Bedoukian and Kosuke Izumi	Hospital Base de Valdivia and Rare Diseases Program, Universidad del Desarrollo, Chile, M Jesus Zavala, Catalina Lagos, Gabriela Repetto	Univeristy of Turin Department of Medical Genetics, Italy, Lisa Pavinato, Francesco Pintus	Randall Children's Hospital, Portland, Oregon, USA, Leslie Granger Andrea Petersen, MD	Department of Medical Sciences, University of Turin, Italy, Lisa Pavinato, Alfredo Brusco, Giorgia Mandrile					Cincinnati Children’s Hospital, USA, Ame Shillington	Kepler University Hospital, Austria, Denisa Weis					Vannes Hospital, France, Florence DEMURGER	UMC Utreht, the Netherlands, Renske Oegema, MaNon Huibers	La Timone Children Hospital, AP-HM, Marseille, France, Florence Riccardi, Svetlana Gorokhova, Chantal Missirian	National Center of Genetics (NCG), Laboratoire National de Santé (LNS), Dudelange, Luxembourg, Guillaume Jouret
total 57							Family A		Family H			Family B											Family D								Family E						Family F								Family G
Patient ID		N_13	N_22	N_64	N_65	N_3	N_33 (Index)	N_34 (Mother)	N_30	N_62	N_63	N_42 (Index)	N_37 (Father)	N_59	N_5	N_66	N_43		N_2	N_67	N_31, Ambrose et al., 2025	N_58	N_19 (Index)	N_20 (Mother)	N_21 (Brother)	N_1	N_12	N_23	N_60	N_17	N_25 (Index)	N_24 (Sister)	N_26 (Brother)	N_27 (Father)		N_32	N_7 (Index) P#3	N_8 (Sister)	N_9 (Brother)	N_10 (Brother)	N_11 (Father)	N_15	N_16	N_18	N_28 (Index)	N_29 (Father)		N_44, Sanders et al., 2011	N_45, Adegbola et al., 2020
chr:pos GRCh37/hg19	Novel	5:11732304del	5:11397184G-A	chr5:11385217del	chr5:11385195G>C	5:11385192G-C	5:11385075_11385079del		5:11199712del		5:11117586del	5:11082943G-A		5:11082943G-A	5:11082931G-A	chr5:11022977_11022992del	5:11022981del		5:11397285T-C	chr5:11385328C>A	5:11385166G-A	5:11346571G-A	5:11364816G-A			5:11236906-G-A	5:11199657_11199659del	5:11117603C-T	5:10992747T-G	5:10992711G-C	5:10988333C-T				Novel	195 kb deletion chr.5: 11690301-111885909	143 kb deletion chr5:11.305.991-11.448.668					371kb deletion Chr5: 11141159- 11513061	3 Mb deletion chr5:10,627,449-13,668,821	chr5:11298758 - 11365002, 65kb deletion	183kb 11116006-11298817		Previously published	Deletion (Hg18):Chr5: 11 403 359-11 491 117	t(5;6)(p15.1;q14.1) breakpoint in CTNND2
cDNA NM_001332.4 (CTNND2)	LOF	c.121del mosaic	c.571C>T	c.738del	c.759C>G	c.762C>G	c.875_879del		c.1823del		c.2256del	c.2653C>T		c.2653C>T	c.2665C>T	c.2888_2903del	c.2899del		c.470A>G	c.626G>T	c.788C>T	c.1541C>T	c.1364C>T			c.1658C>T	c.1879_1881del	c.2236G>A	c.3127A>C	c.3163C>G	c.3233G>A				structural												structural
Exon (22)	variants	2	6	7	7	7	7		11		13	16		16	16	17	17		6	7	7	9	8			10	11	13	19	19	20				variants	2	4-9					4-11	Whole gene deletion	8-9	10-13		variants	4	intron 2
Protein		p.(Asp41Metfs*25)	p.(Arg191*)	p.(Ala247Profs*85)	p.(Tyr253*)	p.(Tyr254*)	p.(Tyr292Cysfs*132)		p.(Val608Alafs*9)		p.(Ser753Alafs*16)	p.(Arg885*)		p.(Arg885*)	p.(Arg889*)	p.(Val963Alafs*3)	p.(Leu967Cysfs*4)	Protein	p.(Gln157Arg)	p.(Arg209Leu)	p.(Pro263Leu)	p.(Ser514Phe)	p.(Thr455Met)			p.(Pro553Leu)	p.(Asp627del)	p.(Val746Met)	p.(Ile1043Leu)	p.(Arg1055Gly)	p.(Arg1078Gln)					Out of frame deletion	In frame deletion of 447 amino acids					Out of frame deletion		Out of frame deletion	Out of frame deletion
Inheritance		De Novo	N.a.	Inherited from affected mother	N.a	de Novo	Inherited from affected mother	N.a.	Inherited from affected father	N.a.	de Novo	Inherited from affected father	N.a.	N.a. (mother not carrier)	Inherited from affected mother	N.a.	Inherited from mother with mild ID	altering	de Novo	Inherited from affected mother	de Novo	de Novo	Inherited from affected mother	N.a.	Inherited from affected mother	N.a.	N.a.	De Novo	de Novo	present in 3 siblings, parents n.a.	Inherited from affected father			N.a.		N.a.	Inherited from affected father				N.a.	de Novo	N.a. (mother not carrier)	de Novo	Inherited from affected father	N.a.		Inherited from affected mother	maternally inherited
ACMG classification		Pathogenic	Likely pathogenic	Likely pathogenic	Likely pathogenic	Pathogenic	Likely pathogenic		Likely pathogenic		Likely pathogenic	likely pathogenic		Likely pathogenic	Likely pathogenic	Likely pathogenic	Likely pathogenic	variants	Likely pathogenic	VUS	Likely pathogenic	Likely pathogenic	VUS			VUS	VUS	Likely pathogenic	Likely pathogenic	VUS	VUS					Likely pathohenic	Likely Pathogenic					Likely Pathogenic	Likely Pathogenic	Likely Pathogenic	Likely Pathogenic
GnomAD v2.1.1 frequency		0	0	0	0	0	0		0		0	0		0	0	0	0		0	0	0	0	0.000008120 (2)			0	0	0.000003977 (1)	0	0	0.000003977 (1)
Gender		Male	Female	Female	Female	Male	Male	Female	Male	Male	Female	Male	Male	Female	Male	Male	Male		Female	Female	Male	Male	Female	Female	Male	Male	Male	Female	Male	Male	Male	Female	Male	Male		Male	Male	Female	Male	Male	Male	Male	Female	Male	Female	Male		Male	Female
Age at last examination		3 years	8 years	10 years	1 day	6 years	11 years	40 years	5 years	42	c.2256del	12 years	N.a.	19 years	46 years	9 years	6 years 5 months		12 years 9 months	15 years	19 months	13y	8 years 9 months	32 years	13 years 2 months	26 years	20 years	11 years	12 years	6 years	11 years	22 months	5 years	N.a.		10 years	4 years	9 years	12 years	15 years	49 years	9 years	25 years	10 years	3 years	N.a.		12 years	10 years
Motor developmental delay		Yes	Yes	Yes	N.a	Yes	Yes	Yes	Yes	N.a.	Yes	No	N.a.	Yes	Yes	N.a.	Yes		Yes	Neurodevelopmental delay	Yes	Yes	Yes	N.a.	No	N.a.	Yes	Yes	Yes	Yes	Yes	Yes	Yes	N.a.		Yes	Yes	Yes	Yes	Yes	Yes	Yes	No	Yes	Yes	Yes		N.a.	N.a.
Age sitting /walking (months)		N.a. / 23 m	12 m / 24m	N.a.	N.a	N.a. / 12 m	N.a.	N.a.	8 m / 17 m	N.a.	11m / 15m	9 m / 17 m	N.a.	12 m / 21 m	N.a. / 24 m	N.a.	6 m / 18 m		N.a. / 18 m	N.a.	N.a. / 17 m	12 m / 24 m	N.a. / 12 m	N.a.	N.a. / 11 m	N.a./13 m	8m / 15 m	6 m / 20 m	N.a.	12 m / 14 m	N.a. / 18 m	N.a. / >24 m	N.a.	N.a.		12 m / N.a.	10 m/ 14 m	10 m/ 16 m	12 m / 17 m	12 m / 16 m	10 m / 18m	N.a. / 20 m	N.a.	N.a. / 19 m	12 m / 28m	N.a.		N.a.	N.a.
Speech delay		No	Yes	Yes	N.a	Yes	No	No	Yes	Yes	Yes	No	N.a.	No	Yes	N.a.	Yes		Yes	Yes	Yes	Yes	Yes	No	No	Yes	Yes	Yes (apraxia)	Yes	Yes	Yes	Yes	N.a.	N.a.		No	Yes	No	Yes	Yes	Yes	Yes	No	Yes	Yes	N.a.		N.a.	N.a.
Age first words		20 m	28 m	N.a.	N.a	> 36 m	12 m	N.a.	9 m	N.a.	1y	9 m	N.a.	N.a.	N.a.	N.a.	8 m		20 m	N.a.	N.a.	36 m	18 m	N.a.	9 m	N.a.	18 m	N.a.	N.a.	12 m	24 m	N.a.	N.a.	N.a.		N.a.	22 m	20 m	32 m	21 m	16 m	24 m	N.a.	24 m	N.a.	N.a.		N.a.	N.a.
Intellectual disability		N.a.	Yes (mild, IQ 55)	Yes	N.a	N.a.	Yes (mild, WISC IQ 68)	Borderline (WISC IQ 82)	N.a.	Learning difficulties	Yes (mild)	Yes (mild)	N.a.	Yes (mild-moderate)	N.a.	N.a.	Borderline		No	Cognitive impairment)	Yes, severe	Yes (mild)	Yes (moderate)	Yes (mild)	learning disability	Yes (moderate)	N.a.	Yes (moderate)	Yes	N.a.	Yes (moderate, WISC-III: 38)	N.a.	Borderline (WPSSII: 70)	Learning disability		Borderline (WISC IQ 70)	No	N.a.	No (WISC-V: 92)	Borderline (WISC-IV: total: 72)	No	N.a.	No	No	N.a.	N.a.		N.a.	N.a.
Autism		No	No	No	N.a	Yes	Yes	Yes	No	N.a.	No	Yes	Yes	No	Yes	N.a.	No		No	Yes	No	No, Autistic traits	No	No	No	Yes	Yes	No	Yes	No, Autistic traits	No, Autistic traits	N.a.	N.a.	N.a.		Yes	No	No	No, Autistic traits	No, Autistic traits	No, Autistic traits	No, Autistic traits	No	Yes	No	N.a.		N.a.	No
Atypical behavior		No	Yes	No	N.a	N.a.	Yes, agressive	Yes, emotional	Yes, agressive	Yes, impulse control disorder,	Yes	N.a.	Yes	Yes, emotional	N.a.	N.a.	Yes, agressive		No	N.a.	No	Yes, emotional	Yes, social	No	No	Yes	Yes	Yes, social	N.a.	Yes, emotional	Yes, agressive	N.a.	N.a.	N.a.		Yes, agressive	Yes, agressive	Yes, emotional	Yes, autistic	Yes, autistic	Yes, autistic	Yes, autistic	No	Yes	Yes, agressive	N.a.		N.a.	N.a.
ADD/ADHD		No	N.a.	No	N.a	N.a.	Yes	No	No	N.a.	No	No	N.a.	Yes	N.a.	Yes	N.a.		No	N.a.	No	No	No	No	Yes	No	No	No	No	No	No	N.a.	N.a.	N.a.		Yes	Yes	No	Yes	Yes	Yes	N.a.	No	Yes Methylphenidate treatment	No	N.a.		N.a.	Yes
Epilepsy / EEG		No / Normal	No / Normal	Yes /Focal epilepsy	N.a	N.a. / N.a.	No / N.a.	No / N.a.	No / increased susceptibility to seizures	N.a.	No / No	No / N.a.	No / N.a.	No / Normal	N.a. / N.a.	Seizures / N.a.	No / N.a.		No. / N.a.	N.a.	No / Normal at 1 year (abnormal at birth)	No / Normal	No / Normal	No / N.a.	No / N.a.	No / N.a.	No / N.a.	Yes / N.a.	No / N.a.	No / N.a.	No / N.a.	No / N.a.	No / N.a.	No / N.a.		No / N.a.	No / Normal	No / Normal	Yes (abscence), onset 2 years / abnormal	No / Normal	Yes, onset 5 years / abnormal	No / n.a.	Yes (focal to bilateral tonic-clonic) / abnormal	No / N.a.	No / N.a.	No / N.a.		N.a. / N.a.	No / N.a.
Brain MRI		Partial corpus callosum agenesis, pereisylvian polymigrogyria, unilateral enophthalmos.	Normal	Normal	N.a	N.a.	Normal	N.a.	Normal	N.a.	N.a.	N.a.	N.a.	Normal	Reduced grey-white differentiation	N.a	N.a.		Hydrocephalus and Chiari I malformation	N.a.	Diffusion restriction consistent with hypoxic ischemic injury (1 day)	N.a.	N.a.	N.a.	N.a.	Normal	Normal	Normal	N.a.	N.a.	Normal	Increased CSF spaces, a thin arachnoid cyst	N.a.	N.a.		N.a.	Normal	N.a.	Normal	N.a.	N.a.	N.a.	Subcortical heterotopia left occiptal lobe, thin isthmus of corpus callosum	N.a.	Normal	N.a.		N.a.	N.a.
Palpebral fissures dysmorphism		No	N.a.	N.a	N.a	Downslanting	No	No	No	N.a.	No	Long	N.a.	Long	No	N.a	No		No	N.a.	No	N.a.	No	No	No	N.a.	No	Almond shaped	No	No	No	downslantig	No	N.a.		Downslanting	Upslanting	Upslanting	Upslanting	Upslanting	Upslanting	No	No	No	Upslanting	N.a.		N.a.	No
Dysmorphism		Microcephaly	Yes	N.a.	N.a	Relative macrocephaly	Borderline microcephaly	No	Malposition of dig III (suspected camptodactyly), flat valgus feet	N.a.	no	Highly arched eyebrows, thin upper lip, long fingers	N.a.	Small and low-set ears	No	N.a	Plagiocephaly		Bilateral supernumerary nipples; bilateral partial cutaneous 2-3 toe syndactyly	N.a.	No	Short philtrum, high forehead	Flat philtrum, thin lips, bilateral fifth toes clinodactyly	Thin upper lip vermilion	No	N.a.	Mild synophrys	Broad forehead, wide nasal base, high palate, clinodactyly, broad palm, single transverse palmar crease	No	Borderline macrocephaly, broad forehead, pointed chin, epicanthus, hypertelorism, posteriorly rotated ear, hickened helicies, thick alae nasi, wide nasal bridge and base with narrow tip	Highly arched eyebrows	Hypertelorism, thin upper lip vermilion, wide nasal bridge	Long philtrum	N.a.		Prominent nasolabial folds, excessive gingival display, highly arched palate	Telecanthus	Telecanthus	Telecanthus	Telecanthus	Telecanthus	No	No	No	Highly arched eyebrows, malar hypoplasia, small mouth, low set ears, anteverted nose	N.a.		N.a.	No
Ophthalmologic features		Moebius- and Duane syndrome, alternating esotropia, unilateral amblyopia, bilateral astigmatism	N.a.	N.a	N.a	No	No	No	No	N.a.	No	No	N.a.	No	No	N.a	Unilateral strabismus		No	Esotropia	No	N.a.	Alternating divergent strabismus	Abnormality of refraction	Unilateral reduced visual acuity	No	No	No	No	No	No	Strabismus	Strabismus	N.a.		No	No	No	No	No	No	No	Myopia	Myopia	Neonatal cculomotor apraxia, assymmetric ocular globes, enophthalmos	N.a.		N.a.	Myopia
Additional symptoms		Failure to thrive, eosinophilia, diffuse eczematoid dermatitis.	N.a.	Velopharyngeal Insufficiency	Pulmonary artery atresia, Patent ductus arteriosus (deceased at 19 days)	N.a.	Migraine, Depression	Anxiety, mood disorder	Discreet muscular hypotonia	N.a.	No	N.a.	N.a.	Dyslexia	N.a.	N.a	N.a.	N.a.	Congenital hydrocephalus due to aqueductal stenosis	Excessive femoral anteversion, short stature	At birth hypoglycemia and needed ventilation, seizures at age 8 hours (ongoing after hypoglycemia corrected)	Obesitas, hemiparesis sinistra	Nasal voice	N.a.	Inverted nipples, overweight	Hypermobile joints, hypospadias, urine retention with bladder distension, constipation.	Slight pectus excavatum, patchy alopecia of scalp	Precocious puberty, food anxiety, hyperlordosis, short stature, dorsocervical fat pad	N.a.	in utero drug exposures, hypothyroidism, accessory oral frenulum	Feeding difficulties	Low appetite	Unilateral congenital hydronephrosis	N.a.		No	Hyperextensibility of large joints	Gracile habitus	Gracile habitus	Gracile habitus	Short stature	Genu recurvatum, cubitus valgus	Purple-reddisch mark on the left arm	Hypotonia, ligament hyperlaxity, sleep-Wake disorder.	Congenital occipital meningocele, moderate hypotonia, ligament hyperlaxity.	N.a.		N.a.	N.a.
[truncated: 12 more columns]

## Sheet: Table S2.Cell lines description
Table S2.Cell lines description
iPSC line	Gender	Genetic variations
P#1: Patient1, (N_48)	XX	balanced reciprocal translocations: t(1;8) (p22;q24);t(5;18)(p15;q11)-(breakpoint at intron9)
P#2: Patient2, (N_49)	XX	balanced reciprocal translocations: t(1;8) (p22;q24); t(5;18)(p15;q11)-(breakpoint at intron9)
P#3: Patient3, (N_7)	XY	Deletion of exons 4–9 in CTNND2
KO#1: KD1 heterozygous	XX	55 deleted nucleotides in exon 5/22 causing premature stop
KO#2: KD3 homozygous	XX	55 deleted nucleotides in exon 5/22 causing premature stop
KO#3: KD7 homozygous	XX	55 deleted nucleotides in exon 5/22 causing premature stop
C#1: CTR14	XX	Control 1
C#2: RD-C1	XX	Control 2
C#3: CTR5	XY	Control 3

## Sheet: Table S3. Antibodies
Table S3 . Antibodies for immunofluorescence
Name	Host	Dilution	Company
CTNND2	Mouse	1:250	Sigma-Aldrich, # MABN2330-25UG
SOX2	Rabbit	1:400	Sigma-Aldrich, #AB5603
NES	Mouse	1:200	Merck, #MAB5326
TJP1	Rabbit	1:100	Invitrogen
Alexa Fluor 488-rabbit	Donkey	1:1000	Invitrogen, #A-21206
Alexa Fluor 594-mouse	Donkey	1:1000	Invitrogen, #A-11016
Alexa Fluor 647-mouse	Donkey	1:1000	Invitrogen, #A-31571

## Sheet: Table S4. Primers
Table S4 . Antibodies for immunofluorescence
Target	Foward primer	Reverse primer
SOX2	CATGAAGGAGCACCCGGATT	TTCATGTGCGCGTAACTGTC
CTNND2	TGAGTCTCCATACAGCAAATCC	GGGTCTCTCCATCCAAATTCTC
TJP1/ZO1	TTGGCCGAGGGATAGAAGTG	CCATCTCTTGCTGCCAAACT
NES	CAGGAGAAACAGGGCCTACAG	GGACTGGGAGCAAAGATCCA
SOX1	ACAGACGTTCCCACATTCTTGT	GAAAACGCTTTCCGCTTCCT
DCX	AGCCATCAAACTGGAGACCG	GCGTCTTGGTCGTTACCTGA
TUJ1/TUBB3	CTCGAGCCATTCTGGTGGAC	ATACTCCTCACGCACCTTGC
PAX6	GTTGGTATCCGGGGACTTCG	GCTGAAGTCGCATTTGAGCC
OTX2	CTGAGTCTGACCACTTCGGG	GATGTCTGGGTACCGGGTCT
EN1	CGTGGCTTACTCCCCATTTA	TCTCGCTGTCTCTCCCTCTC
GBX2	TCCCGGAACCCTAAGATCGTCG	ACAGCTGGGCTGTGACTTTGTTGC
MAP2	CTCGGCGAGGTGTGTCAG	CAGGGGTAGTGGGTGTTGAG
KI67	AGAAGACCTGCTACTCCAAAGAA	GTCGAGCAGGCACATGTACT
GAPDH	CCATGAGAAGTATGACAACAGCC	TGGTCATGAGTCCTTCCACG
ACTB	CGCGAGAAGATGACCCAGAT	GAGGCGTACAGGGATAGCAC

## Sheet: Table S5. Expression profile
Table S5. Expression profile of PANTHER WNT pathway genes found in P#1
ENSG	baseMean	log2FoldChange	padj	Gene.name	FoldChange	ExpressionPatternVSCtrl		Upregulated	Downregulated
ENSG00000004975	3765.95	-0.418659	0.00458041	DVL2	0.74812	downregulated		82	46
ENSG00000027075	206.829	5.14252	5.1712e-34	PRKCH	35.3226	upregulated		0.640625	0.359375
ENSG00000040731	544.743	-1.76394	5.48725e-25	CDH10	0.294444	downregulated
ENSG00000049618	4402.29	0.343158	0.00469578	ARID1B	1.26853	upregulated
ENSG00000062038	2885.57	4.79678	2.62202e-40	CDH3	27.7954	upregulated
ENSG00000066027	1042.24	0.708508	4.30597e-14	PPP2R5A	1.63411	upregulated
ENSG00000066032	1189.33	1.50683	1.59257e-06	CTNNA2	2.84184	upregulated
ENSG00000067606	780.797	0.693699	4.46455e-06	PRKCZ	1.61743	upregulated
ENSG00000068971	524.644	1.0382	8.22021e-07	PPP2R5B	2.05367	upregulated
ENSG00000075275	3892.07	-1.23555	1.09477e-05	CELSR1	0.42468	downregulated
ENSG00000075290	75.1642	2.83381	1.27784e-06	WNT8B	7.12953	upregulated
ENSG00000075624	137195	0.553926	2.31488e-08	ACTB	1.46808	upregulated
ENSG00000080503	483.506	2.99189	5.93512e-12	SMARCA2	7.95514	upregulated
ENSG00000081059	599.233	0.903921	0.000815956	TCF7	1.87114	upregulated
ENSG00000081138	718.464	-1.13084	1.0919e-08	CDH7	0.456649	downregulated
ENSG00000082014	744.505	-0.676951	8.23608e-08	SMARCD3	0.625486	downregulated
ENSG00000083857	17244.6	-0.532067	4.02739e-09	FAT1	0.691563	downregulated
ENSG00000096433	649.56	3.84248	3.5255e-15	ITPR3	14.345	upregulated
ENSG00000101266	14449.3	-0.498948	0.000114059	CSNK2A1	0.707623	downregulated
ENSG00000101333	1041.69	1.02927	4.07825e-05	PLCB4	2.04099	upregulated
ENSG00000102290	386.207	2.59598	8.12467e-28	PCDH11X	6.04601	upregulated
ENSG00000104290	13717.2	-1.15181	9.20253e-07	FZD3	0.450061	downregulated
ENSG00000104332	7508.82	-1.46132	0.000130308	SFRP1	0.363161	downregulated
ENSG00000106483	3860.05	-6.27116	1.5164e-18	SFRP4	0.0129477	downregulated
ENSG00000106829	4351.02	-1.55162	1.38719e-22	TLE4	0.341128	downregulated
ENSG00000107736	694.93	-3.53861	2.11093e-44	CDH23	0.086054	downregulated
ENSG00000107779	4324.03	0.376888	0.00496492	BMPR1A	1.29854	upregulated
ENSG00000108379	337.193	1.34395	2.75313e-20	WNT3	2.53845	upregulated
ENSG00000108604	3013.59	0.393106	8.80569e-08	SMARCD2	1.31322	upregulated
ENSG00000110092	6874.33	0.67147	5.32111e-06	CCND1	1.5927	upregulated
ENSG00000111432	916.588	1.3343	0.000489855	FZD10	2.52153	upregulated
ENSG00000111664	175.109	-1.96284	8.99385e-06	GNB3	0.256523	downregulated
ENSG00000112852	1710.39	0.773284	0.000988323	PCDHB2	1.70916	upregulated
ENSG00000113248	849.215	1.1424	3.30016e-06	PCDHB15	2.20747	upregulated
ENSG00000113361	5093.86	4.81719	8.21223e-16	CDH6	28.1915	upregulated
ENSG00000114251	1679.85	4.40855	1.44699e-100	WNT5A	21.2376	upregulated
ENSG00000116990	2756.6	-1.14328	1.32051e-06	MYCL	0.452729	downregulated
ENSG00000120324	404.11	0.638596	8.1275e-05	PCDHB10	1.55681	upregulated
ENSG00000120327	480.048	0.702609	0.000343452	PCDHB14	1.62744	upregulated
ENSG00000123104	581.913	3.92494	1.93932e-34	ITPR2	15.1889	upregulated
ENSG00000126583	242.91	-1.881	1.07356e-05	PRKCG	0.271496	downregulated
ENSG00000131196	401.478	1.56042	2.78615e-12	NFATC1	2.94941	upregulated
ENSG00000131650	199.031	3.60801	5.19199e-15	KREMEN2	12.1932	upregulated
ENSG00000131778	3118.51	0.364231	0.00236935	CHD1L	1.2872	upregulated
ENSG00000134323	2492.7	1.38886	6.17182e-05	MYCN	2.61872	upregulated
ENSG00000135299	3606.45	-2.40408	1.78269e-31	ANKRD6	0.18893	downregulated
ENSG00000136099	1542.3	-4.6639	2.27812e-08	PCDH8	0.0394481	downregulated
ENSG00000136997	153.375	0.812972	0.00450522	MYC	1.75683	upregulated
ENSG00000137486	471.334	1.63704	3.39151e-12	ARRB1	3.11028	upregulated
ENSG00000138650	402.367	5.96125	6.95043e-41	PCDH10	62.3037	upregulated
ENSG00000138696	980.803	-3.51537	2.83057e-30	BMPR1B	0.0874514	downregulated
ENSG00000138795	2375.98	1.99676	1.43577e-30	LEF1	3.99104	upregulated
ENSG00000138814	1666.31	0.843028	0.000452441	PPP3CA	1.79381	upregulated
ENSG00000139613	3471.87	-0.628095	3.15206e-07	SMARCC2	0.64703	downregulated
ENSG00000140807	5548.98	1.12362	7.06784e-05	NKD1	2.17893	upregulated
ENSG00000141480	1938.6	-0.813753	6.65467e-06	ARRB2	0.5689	downregulated
ENSG00000141510	4872.53	-0.488194	0.00114578	TP53	0.712917	downregulated
ENSG00000141551	4958.33	0.366513	0.000584616	CSNK1D	1.28923	upregulated
ENSG00000143126	14678.9	-1.65071	1.40832e-11	CELSR2	0.318484	downregulated
ENSG00000143632	70.6506	2.13891	1.13156e-05	ACTA1	4.4043	upregulated
ENSG00000143816	97.9488	1.35666	0.00508404	WNT9A	2.56092	upregulated
ENSG00000145423	7162.68	-1.90819	1.63742e-50	SFRP2	0.266426	downregulated
ENSG00000146555	1525.5	1.73432	2.24346e-27	SDK1	3.32724	upregulated
ENSG00000147099	693.693	0.566061	0.000807412	HDAC8	1.48048	upregulated
ENSG00000148600	596.955	-3.07438	5.14995e-22	CDHR1	0.118719	downregulated
ENSG00000149654	71.9082	-2.66178	8.66936e-15	CDH22	0.158024	downregulated
ENSG00000150394	983.603	-2.70592	4.98171e-23	CDH8	0.153262	downregulated
ENSG00000150995	275.305	0.776866	0.000115637	ITPR1	1.7134	upregulated
ENSG00000154229	1994.73	-1.3123	3.75542e-08	PRKCA	0.402678	downregulated
ENSG00000154764	732.715	-5.50574	1.12604e-50	WNT7A	0.0220094	downregulated
ENSG00000155760	12838.4	-1.57521	1.18853e-07	FZD7	0.335594	downregulated
ENSG00000156453	834.352	3.27842	6.40222e-61	PCDH1	9.7029	upregulated
ENSG00000157240	800.79	1.12973	5.20449e-09	FZD1	2.18818	upregulated
ENSG00000159251	3088.95	4.05937	1.23987e-21	ACTC1	16.6721	upregulated
ENSG00000162188	234.765	1.81649	8.01636e-07	GNG3	3.52224	upregulated
ENSG00000162337	2073.7	0.811317	0.000456985	LRP5	1.75481	upregulated
ENSG00000162552	210.492	5.29481	3.31337e-87	WNT4	39.2552	upregulated
ENSG00000162998	577.527	0.944667	0.000665016	FRZB	1.92474	upregulated
ENSG00000163017	116.596	3.55717	2.3163e-09	ACTG2	11.7711	upregulated
ENSG00000163251	517.476	-0.590797	0.000169714	FZD5	0.663976	downregulated
ENSG00000163430	23992.6	0.804678	1.48969e-05	FSTL1	1.74676	upregulated
ENSG00000163558	3375.46	0.342885	0.0031803	PRKCI	1.26829	upregulated
ENSG00000163932	817.269	0.824942	2.14853e-05	PRKCD	1.77146	upregulated
ENSG00000164778	263.788	9.38378	1.51268e-70	EN2	668.034	upregulated
ENSG00000164930	1257.31	0.897615	0.00015298	FZD6	1.86298	upregulated
ENSG00000165194	1329.42	-1.84005	2.94533e-12	PCDH19	0.279313	downregulated
ENSG00000165323	2530.88	-1.36879	6.36737e-09	FAT3	0.387217	downregulated
ENSG00000165617	3055.53	5.4291	3.04769e-224	DACT1	43.0845	upregulated
ENSG00000166167	2165.27	0.578156	0.000182845	BTRC	1.49294	upregulated
ENSG00000166341	2626.06	-0.539669	1.94517e-05	DCHS1	0.687929	downregulated
ENSG00000166501	280.237	-0.622311	0.00784582	PRKCB	0.649629	downregulated
ENSG00000168036	26743.1	0.746373	5.5529e-09	CTNNB1	1.67757	upregulated
ENSG00000168646	5835.21	1.36014	3.35212e-10	AXIN2	2.56711	upregulated
ENSG00000169118	2052.73	-0.473079	3.2337e-05	CSNK1G1	0.720425	downregulated
ENSG00000169851	1411.54	3.78725	9.13657e-32	PCDH7	13.8063	upregulated
ENSG00000170558	32962.3	-1.99858	8.16719e-16	CDH2	0.250247	downregulated
ENSG00000171132	569.212	0.819165	7.06991e-06	PRKCE	1.76438	upregulated
ENSG00000171720	2921.17	0.382378	3.28714e-05	HDAC3	1.30349	upregulated
ENSG00000172354	6441.1	-0.544272	4.94746e-11	GNB2	0.685737	downregulated
ENSG00000172380	1027.54	0.787035	3.66133e-06	GNG12	1.72552	upregulated
ENSG00000174021	3189.12	0.324635	0.000707876	GNG5	1.25235	upregulated
ENSG00000175029	6069.31	0.585082	4.38618e-07	CTBP2	1.50012	upregulated
ENSG00000177283	257.068	0.834248	0.00016055	FZD8	1.78293	upregulated
ENSG00000177839	148.895	1.05011	0.00418099	PCDHB9	2.07069	upregulated
ENSG00000179242	240.222	-1.49153	2.01931e-12	CDH4	0.355635	downregulated
ENSG00000180340	4863.33	-2.1238	2.01793e-12	FZD2	0.229442	downregulated
ENSG00000181788	1413.44	1.35631	9.71128e-05	SIAH2	2.5603	upregulated
ENSG00000183230	441.614	-2.64099	6.48397e-11	CTNNA3	0.160318	downregulated
ENSG00000183495	6894.58	-0.45056	0.00210662	EP400	0.731759	downregulated
ENSG00000183762	806.633	1.12518	1.28645e-08	KREMEN1	2.18128	upregulated
ENSG00000184226	302.602	1.93764	6.5504e-07	PCDH9	3.83078	upregulated
ENSG00000186469	4683.73	0.959902	3.50989e-09	GNG2	1.94518	upregulated
ENSG00000187372	266.702	1.22332	1.18294e-09	PCDHB13	2.33484	upregulated
ENSG00000188064	259.377	0.839529	0.00940388	WNT7B	1.78947	upregulated
ENSG00000188763	303.336	-4.33336	4.22476e-21	FZD9	0.0496054	downregulated
ENSG00000189184	12445.6	-2.27006	2.16884e-14	PCDH18	0.207322	downregulated
ENSG00000196781	4148.56	2.02747	5.6279e-50	TLE1	4.07688	upregulated
ENSG00000197410	61.7729	-2.74874	5.59436e-19	DCHS2	0.148781	downregulated
ENSG00000204967	640.576	0.760902	0.0016133	PCDHA4	1.69455	upregulated
ENSG00000204969	226.641	-0.764284	0.00250821	PCDHA2	0.588746	downregulated
ENSG00000240184	5129.11	0.657368	7.89345e-09	PCDHGC3	1.5772	upregulated
ENSG00000242419	641.51	0.721668	1.81914e-05	PCDHGC4	1.64909	upregulated
ENSG00000248383	116.176	0.901444	0.000139602	PCDHAC1	1.86793	upregulated
ENSG00000251664	402.345	1.3832	3.40942e-10	PCDHA12	2.60846	upregulated
ENSG00000253731	90.988	1.93406	0.008584	PCDHGA6	3.82128	upregulated
ENSG00000253846	947.288	-1.87153	7.93019e-42	PCDHGA10	0.273283	downregulated
ENSG00000254122	1283.45	1.73355	3.78413e-34	PCDHGB7	3.32544	upregulated
ENSG00000272674	204.971	0.757046	0.00631466	PCDHB16	1.69003	upregulated
