# Supplementary material for: Characterization of CTNND2-related neurodevelopmental disease, phenotype-genotype spectrum and WNT dynamics in early neurogenesis
Source: Research Square preprint supplement (doi:10.21203/rs.3.rs-8224288/v1), 2025-12-30
Supplement: Supplementary file 3 [file da88fcabbaaa8ee31cd45fe9.docx]

Additional File 2

# Supplementary Methods

## Generation of human iPSC lines and cell culture

Fibroblasts at a low passage were used for reprogramming using the non-integrating *Sendai virus* vectors. Multiple iPSC clones for each individual were established in xeno-free and defined conditions E8 medium (Thermo Fisher) as previously described (Kele et al., 2016). iPSC lines were cultured on human recombinant Laminin-521 (Biolamina) coated plates and passed every 3 to 5 days chemically using TrypLE-Select (ThermoFisher). All iPSC lines were characterized using essential pluripotency markers OCT4 and SOX2 with flowcytometry followed by karyotyping via G-banding.

## Structural variant analysis of iPSC lines

The three patient iPSC lines were extensively investigated to rule out any acquired structural chromosomal rearrangements during the culture. Three separate analyses were done:

1. karyotyping via G-banding. iPSC cultures at approximately 70% confluency were prepared for G-banding karyotyping. Cells were treated with colcemid to arrest them in metaphase, followed by standard cytogenetic procedures. For each cell line, 25 metaphases were analyzed to identify potential chromosomal abnormalities.
2. SNP-array analysis: Molecular karyotype was assessed using copy number variation analysis via SNP-array. Genomic DNA from all patient-derived iPSC lines was sent to Life & Brain GmBh for SNP-array to identify potential CNVs. DNA sequencing was conducted with Illumina BeadArray Technology using the Illumina Infinium Global Screening Array-24 BeadChip. Genotype analysis was performed by the Cell and Gene Therapy Core, Lund University using GenomeStudio V2.0.5 and the CNV Partion 3.2.0. Data were analyzed according to the WiCell Institute stringent CNV thresholds for iPSCs. The minimum probe count was set to 30, reportable cut off were set to 400kB for gains and losses and 5MB for loss of heterozygosity regions with a confidence cut off at 35.
3. Optical genome mapping: Genomic ultra-high molecular weight DNA from the three patient iPSC lines was extracted using the SP-G2 Blood & Cell Culture DNA Isolation Kit, and subsequently labelled and stained using the DLS-G2 Labelling kit (Bionano Genomics) according to manufacturer’s protocol (CG-00004, rev B and 30553-1, Rev E). The labelled and stained DNA was loaded onto a flowcell and captured using the Saphyr system (Bionano Genomics). Data were analyzed with Bionano Solve (v3.7) and interpreted using Bionano Access (v1.7.2).

## Generation of *CTNND2* knockout lines using CRISPR-Cas9 technology

Knockout cell lines were generated and validated at the Karolinska Genome Engineering (KGE) core and the iPSCore facilities at Karolinska Institutet, utilizing control 14 (C#1) as the parental line. CRISPR/Cas9 technology was employed to target exon 5 of hsCTNND2 (ENST00000304623.13) with two synthetic single guide RNAs (sgRNAs): (g1, 5’-CACCTGTAGAATAATCCTGT-3’ and g2, 5’-GCTTACAACAGGTCTCGAGC-3’; CRISPRevolution sgRNA EZ Kit, Synthego; 1 or 2 µg in total). These sgRNAs were precomplexed with 5 or 10 µg Cas9 protein (Alt-R® S.p. Cas9 Nuclease V3, IDT) into ribonucleoproteins (RNPs). RNPs were introduced into the cells by electroporation using an Amaxa 4D-Nucleofector (Lonza Bioscience). To obtain knockout clones, cells from both the lower and higher concentration RNP electroporations were seeded by limiting dilution. After expansion, genomic DNA was extracted from seven clones using a QIAamp DNA mini kit (Qiagen). The edited locus was amplified using KAPA HiFi Hot start polymerase (Roche) and specific oligos for CTNND2 (5’- GTAACTATGCTCTTCAAGGGTAC-3’ and 5’-GGGACGGAGTGAAATGGATAA-3’). PCR products were purified and subsequently Sanger sequenced (Eurofins Genomics). Sequencing traces were deconvoluted by DECODR software v3.0. Sequencing analysis identified a 55-bp deletion as expected. Three clones were selected, characterized, and used for the study: KO#1 exhibited heterozygosity for the deletion, while KO#2 and KO#3 were homozygous (Fig S1A and B).

## Generation of neuroepithelial-like stem cell (NESC) lines

NESCs were generated and established from the nine iPSC lines (Table S2) as previously described with dual-smad inhibition protocol (Chambers et al. 2009) with applying some modifications (Calvo-Garrido et al. 2021). A well-established iPSC culture was treated with hNoggin (0.5 ng/ml Peprotech), TGFB-inhibitor SB431542 (10 μM, STEMCELL Technologies), and GSK3 inhibitor CHIR (3.3 µM) for 12 days to induce neural differentiation (Fig 1A). CHIR was maintained throughout the induction, hNoggin from day 1 to day 10 and SB431542 only for the first 4 days. On day 5 of induction, cells were replated on plates coated with 0.1 mg poly-L-ornithine (Sigma-Aldrich), 1 μg/ml laminin L2020 (Sigma-Aldrich), and 1 μg/ml laminin L2020 (Sigma-Aldrich). Induced cells were plated onto 0.1 mg poly-L-ornithine (Sigma-Aldrich) and 1 μg/ml laminin L2020 (Sigma-Aldrich) coated plates at high density (40,000 cells/cm2) in NESC medium consisting of DMEM/F-12 GlutaMAX supplemented with N2 1%, B27 (0.1%), FGF2 (10 ng/ml), and Pen/Strep all from Invitrogen and EGF (10 ng ml/m1; Peprotech). Established NESC lines were cultured as adherent monolayers, passaged at the ratio of 1:3 every third day with TrypL-Express, and frozen in the NESC medium containing 10% DMSO.

## Generation of cerebral 3D grown organoids

The generation of cerebral organoids followed a modified version of the protocol by Lancaster and Knoblich (Lancaster & Knoblich, 2014) that consisted of the following key steps:

*EB Formation*: Adherent human-induced pluripotent stem cells (hiPSCs) were dissociated on day 0 and seeded at a density of 60,000 cells/mL in 150 µL per well. The cells were cultured using E8 medium supplemented with 1% (v/v) E8 supplement and 1% (v/v) penicillin/streptomycin, along with 50 µM rho-kinase inhibitors. The cells were seeded in 96-well round bottom ultra-low attachment plates (Costar, #7007). To ensure consistency and reduce technical variability, a multichannel pipette was used to fill the plates. On days 2 and 4, half of the medium was replaced and filled to a total volume of 150 µL.

*Neural Induction*: On day 6, embryoid bodies (EBs) with round morphology, smooth edges, and a translucent periphery were transferred to a 24-well ultra-low attachment plate (Corning, #3473) with one EB per well. The wells were cultured in DMEM/F-12 + Neurobasal medium (1:1) supplemented with 1% N2, 1% GlutaMAX, 1% MEM.NEAA, 1% (v/v) penicillin/streptomycin, and 1 µg/mL heparin. On day 8, 500 µL of fresh medium was added, and on day 10, half of the medium was changed while maintaining a total volume of 500 µL.

*Expansion*: When the organoids started showing neuroepithelium tissue between day 10 and 11, they were embedded in 15 µL Extracellular matrix gel (Sigma, #E6909-5mL) placed on parafilm. The gel-embedded organoids were allowed to solidify for 20 minutes at 37 °C with 5% CO2. Next, the parafilm strip with organoids was placed in a 60 mm dish and cultured for four additional days in DMEM/F-12 + Neurobasal medium (1:1) supplemented with 0.5% N2, 1% GlutaMAX, 1% MEM.NEAA, 1% (v/v) penicillin/streptomycin, 0.025% (v/v) insulin, 0.16 µM β-mercaptoethanol (=expansion medium), and 2% B27 without vitamin A. Half of the medium was replaced on day 13.

*Maturation*: On day 15, the embedded organoids were gently washed off the parafilm strip and transferred to a 24-well low attachment plate (Corning, #3473), one organoid per well. The maturation phase lasted for 15 days, during which the organoids were cultured in expansion medium supplemented with 2% B27 containing vitamin A. The plate was placed on an orbital shaker rotating at 60 rpm, and the medium was replaced every 3 days.

Throughout the culture process, stringent environmental conditions were maintained with incubation at 37 °C and 5% CO2, unless otherwise specified.

## Immunofluorescence staining

The cultured cells, both monolayer and organoids, were fixed in Fixative solutions (Invitrogen, #FB002) at 4°C for 10 minutes and 20 minutes, respectively. Following fixation, they were washed in washing buffer (0.5% Tween20/PBS). Organoids were then dehydrated overnight at 4°C in 30% (w/v) sucrose/PBS and embedded in OCT cryomount (Histolab, #45830). The frozen tissue was sectioned into 20 µm slices, which were subsequently collected on slides. Before staining, excess OCT cryomount was removed from the slides.

Both the monolayer and sectioned samples were incubated in blocking buffer (1% (w/v) bovine serum albumin/0.5% (v/v) Tween20/PBS) for 30 minutes at room temperature, followed by overnight incubation with the primary antibody in diluted blocking buffer at 4°C (Table S3). After three washing steps using a washing buffer, the samples were incubated with the secondary antibody at room temperature for 1 hour. Following three additional washing cycles in washing buffer (15 minutes each), the samples were stained with DAPI using standard protocols, washed again with the washing buffer, and finally mounted in 80% (v/v) glycerol.

## Quantitative real-time PCR for expression analysis

RNA was extracted with TRIzol (Invitrogen, #15596026) following the standard extraction protocol with chloroform. The cDNA was obtained using SuperScript III First-Strand Synthesis System and supplied protocol (Invitrogen, #18080051). Quantitative real-time PCR was performed with SsoAdvanced Universal SYBR Green Supermix and provided protocol (BioRad, #1725271) preparing in biological (n=3) with technical replicates and included no-template controls. The samples were checked for housekeeping gene expression deviation in all culture conditions. The expression data were normalized using housekeeping genes (GAPDH and ACTB) and subsequently compared to unaffected control cell lines. The primers were checked for gene specificity, transcript usage, melting curve and amplification efficiency. The primer sequences are listed in Supplemental Table S4.

## Transcriptome data processing and analysis

## Total RNA was extracted in triplicates from 2D-cultured cells at day 12/P0 and P6 using the RNeasy Mini Kit on the QIAcube Connect robot (QIAGEN). Bulk RNA-Seq was performed using Illumina TruSeq Stranded mRNA library preparation on a NovaSeq6000 platform based at the National Genomics Infrastructure (NGI Stockholm). Raw reads were processed with an in-house pipeline (Ewels et al. 2020) nf-core/rnaseq (github.com/nf-core/rnaseq); including quality control, data cleaning, read alignment to GRCh38 (STAR), and transcript quantification (Salmon). The data resulted in roughly 50.49 million reads and 142 nucleotides on average per donor that were uniquely mapped to the genome.

The Salmon files were filtered for TPM values higher than 1 before feeding into DeSeq2 (Love et al., 2014) in R with default settings for differential gene expression analysis and filtered against gene expression below a base mean of 50. Significance was assessed by using the Wald test, followed by Benjamini-Hochberg p-value correction. The adjusted p-value, typically limited to a 10% false discovery rate (FDR), was further constrained to 1% as threshold for statistical significance. Differential expression was achieved at 25% higher or lower fold changes compared to controls. PCA clusters were generated using the DESeq2 package, which involved the initial conversion of TPM files from Salmon into count data, followed by internal data normalization. The final PCA analysis included data scaling to harmonize across samples, eigenvalue computation to assess the variance explained by each principal component, and the sorting of principal components based on their predominant contributions. Krustal-Wallis tests were performed to compare group clustering using the principal components as outcome vector. The threshold for statistical significance was limited to p=0.001.

Differentially expressed genes were analyzed for pathway enrichment using PANTHER. Subsequently, statistical evaluation of the findings was conducted using Fisher's Exact test with p-value correction to determine the false discovery rate.

For WNT pathway specific analysis, genes from the RNA seq data were annotated, with green indicating upregulation and red indicating downregulation. Subsequently, the dataset was refined to include only genes associated with the WNT signaling pathway in the Kyoto Encyclopedia of Genes and Genomes, KEGG (Kanehisa et al., 2016), map04310. The resulting table was then uploaded to [www.kegg.jp/pathway/map04310](https://www.kegg.jp/pathway/map04310) for visualization.

## GestaltMatcher facial image analysis

We analyzed facial similarity among 15 *CTNND2* patients using the GestaltMatcher (Hsieh et al., 2022; Mak et al., 2025) framework, which encodes each image into 12 512-dimensional embeddings via an ensemble model and test-time augmentation (Hustinx et al., 2022). Subject similarity was quantified by averaging cosine distances across all pairs.

To assess intra-cohort similarity, we compared the mean pairwise distances of *CTNND2* patients to reference distributions generated from the GestaltMatcher Database (GMDB) (Lesmann et al., 2024; Mak et al., 2025), consisting of 1,555 images from 328 syndromes. Control distributions included (1) subjects with the same syndrome and (2) random subjects. For each syndrome and random sample size (n ≥ 2), 100 non-redundant cohorts were drawn and analyzed. For each cohort, we computed all pairwise cosine distances between facial embeddings. The average of these distances served as a measure of within-cohort similarity.

We conducted a five-fold cross-validated ROC analysis using these control cohorts to establish a decision threshold (*c* = 0.915) for facial similarity, yielding a sensitivity of 0.851, specificity of 0.862, and AUC of 0.895. The similarity of the *CTNND2* cohort was then evaluated by sampling subcohorts (*n* = 2 to |*C*|) 100 times and comparing their pairwise distances to the control distributions. We ensured that the patients from the same family were not sampled in the same subcohort to avoid the bias. If more than 50% of the sampled cohorts from the group (15 *CTNND2* patients) have a mean distance distribution above the threshold, the distribution is considered more consistent with random similarity rather than phenotypic clustering.

Finally, we performed a pairwise comparison by testing each *CTNND2* patient against 7,459 GMDB images (449 disorders), using leave-one-out cross-validation to assess the relative ranks of the remaining *CTNND2* patients.

# References:

Hsieh, T. C., Bar-Haim, A., Moosa, S., Ehmke, N., Gripp, K. W., Pantel, J. T., Danyel, M., Mensah, M. A., Horn, D., Rosnev, S., Fleischer, N., Bonini, G., Hustinx, A., Schmid, A., Knaus, A., Javanmardi, B., Klinkhammer, H., Lesmann, H., Sivalingam, S., … Krawitz, P. M. (2022). GestaltMatcher facilitates rare disease matching using facial phenotype descriptors. *Nature Genetics*, *54*(3), 349–357. https://doi.org/10.1038/S41588-021-01010-X,

Hustinx, A., Hellmann, F., Sümer, Ö., Javanmardi, B., André, E., Krawitz, P., & Hsieh, T.-C. (2022). *Improving Deep Facial Phenotyping for Ultra-rare Disorder Verification Using Model Ensembles*. https://doi.org/10.1109/WACV56688.2023.00499

Kanehisa, M., Sato, Y., Kawashima, M., Furumichi, M., & Tanabe, M. (2016). KEGG as a reference resource for gene and protein annotation. *Nucleic Acids Research*, *44*(D1), D457–D462. https://doi.org/10.1093/nar/gkv1070

Kele, M., Day, K., Rönnholm, H., Schuster, J., Dahl, N., & Falk, A. (2016). Generation of human iPS cell line CTL07-II from human fibroblasts, under defined and xeno-free conditions. *Stem Cell Research*, *17*(3), 474–478. https://doi.org/10.1016/j.scr.2016.09.028

Lancaster, M. A., & Knoblich, J. (2014). Generation of Cerebral Organoids from Human Pluripotent Stem. *Nature Protocols*, *9*(10), 2329–2340. https://doi.org/10.1038/nprot.2014.158

Lesmann, H., Hustinx, A., Moosa, S., Klinkhammer, H., Marchi, E., Caro, P., Abdelrazek, I. M., Pantel, J. T., Ten Hagen, M., Thong, M.-K., Binti Mazlan, R. A., Tae, S. K., Kamphans, T., Meiswinkel, W., Li, J.-M., Javanmardi, B., Knaus, A., Uwineza, A., Knopp, C., … Hsieh, T.-C. (2024). GestaltMatcher Database - A global reference for facial phenotypic variability in rare human diseases. *MedRxiv : The Preprint Server for Health Sciences*. https://doi.org/10.1101/2023.06.06.23290887

Love, M. I., Huber, W., & Anders, S. (2014). Moderated estimation of fold change and dispersion for RNA-seq data with DESeq2. *Genome Biology*, *15*(12). https://doi.org/10.1186/s13059-014-0550-8

Mak, C. C. Y., Klinkhammer, H., Choufani, S., Reko, N., Christman, A. K., Pisan, E., Chui, M. M. C., Lee, M., Leduc, F., Dempsey, J. C., Sanchez-Lara, P. A., Bombei, H. M., Bernat, J. A., Faivre, L., Tran Mau-Them, F., Palafoll, I. V., Canham, N., Sarkar, A., Zarate, Y. A., … Chung, B. H. Y. (2025). Artificial intelligence-driven genotype-epigenotype-phenotype approaches to resolve challenges in syndrome diagnostics. In *www.thelancet.com* (Vol. 115). www.thelancet.com
