# Supplementary figures and images for: Characterization of CTNND2-related neurodevelopmental disease, phenotype-genotype spectrum and WNT dynamics in early neurogenesis
Source: Research Square preprint supplement (doi:10.21203/rs.3.rs-8224288/v1), 2025-12-30

Additional File 3

Fig S1

Fig S2

Fig S3

**
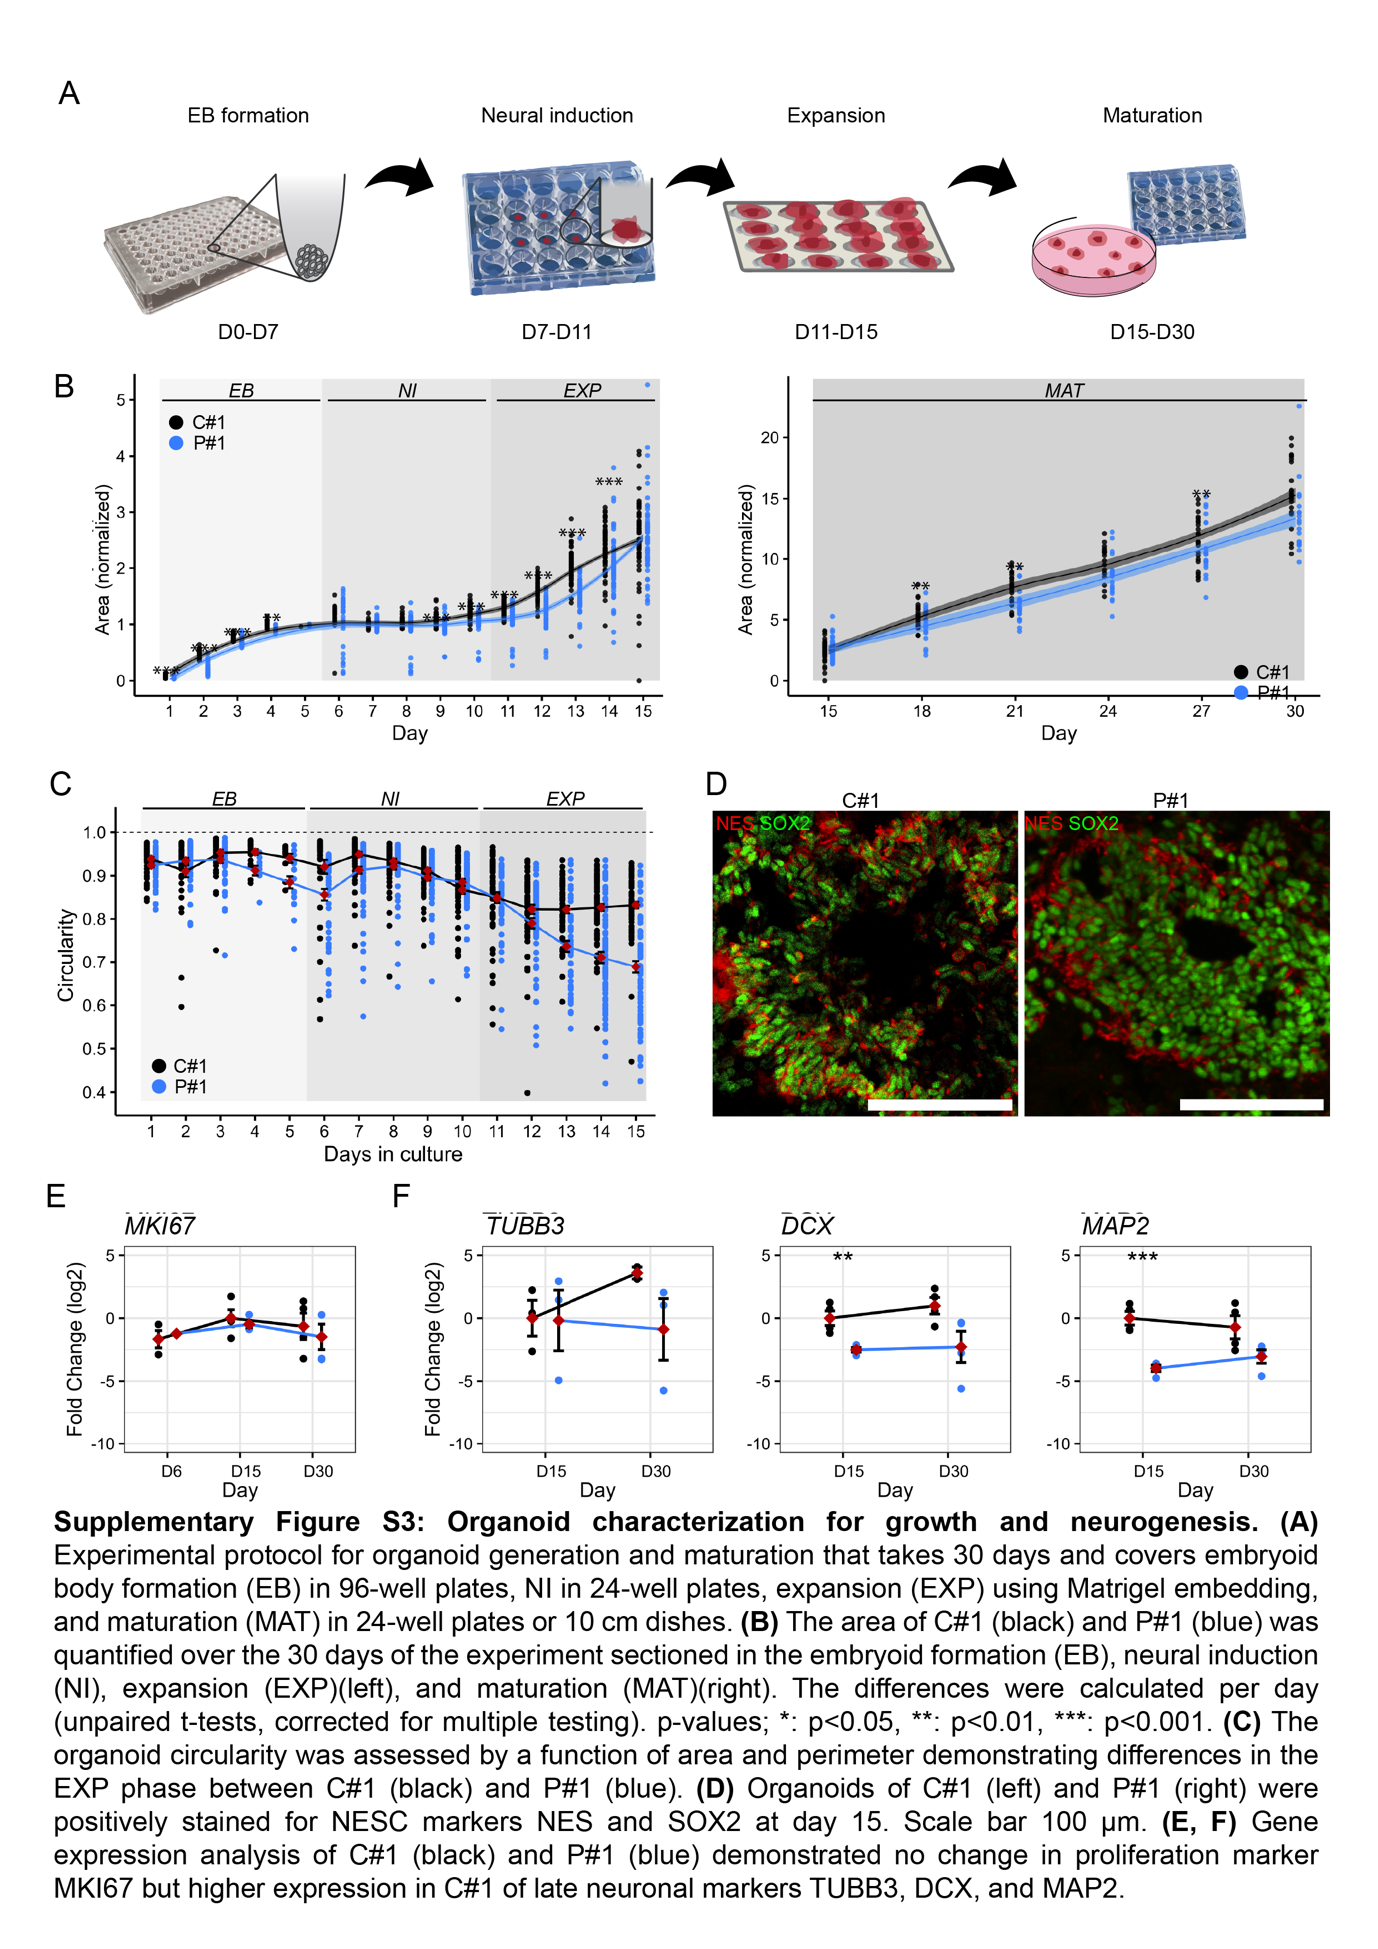
**

Fig S4


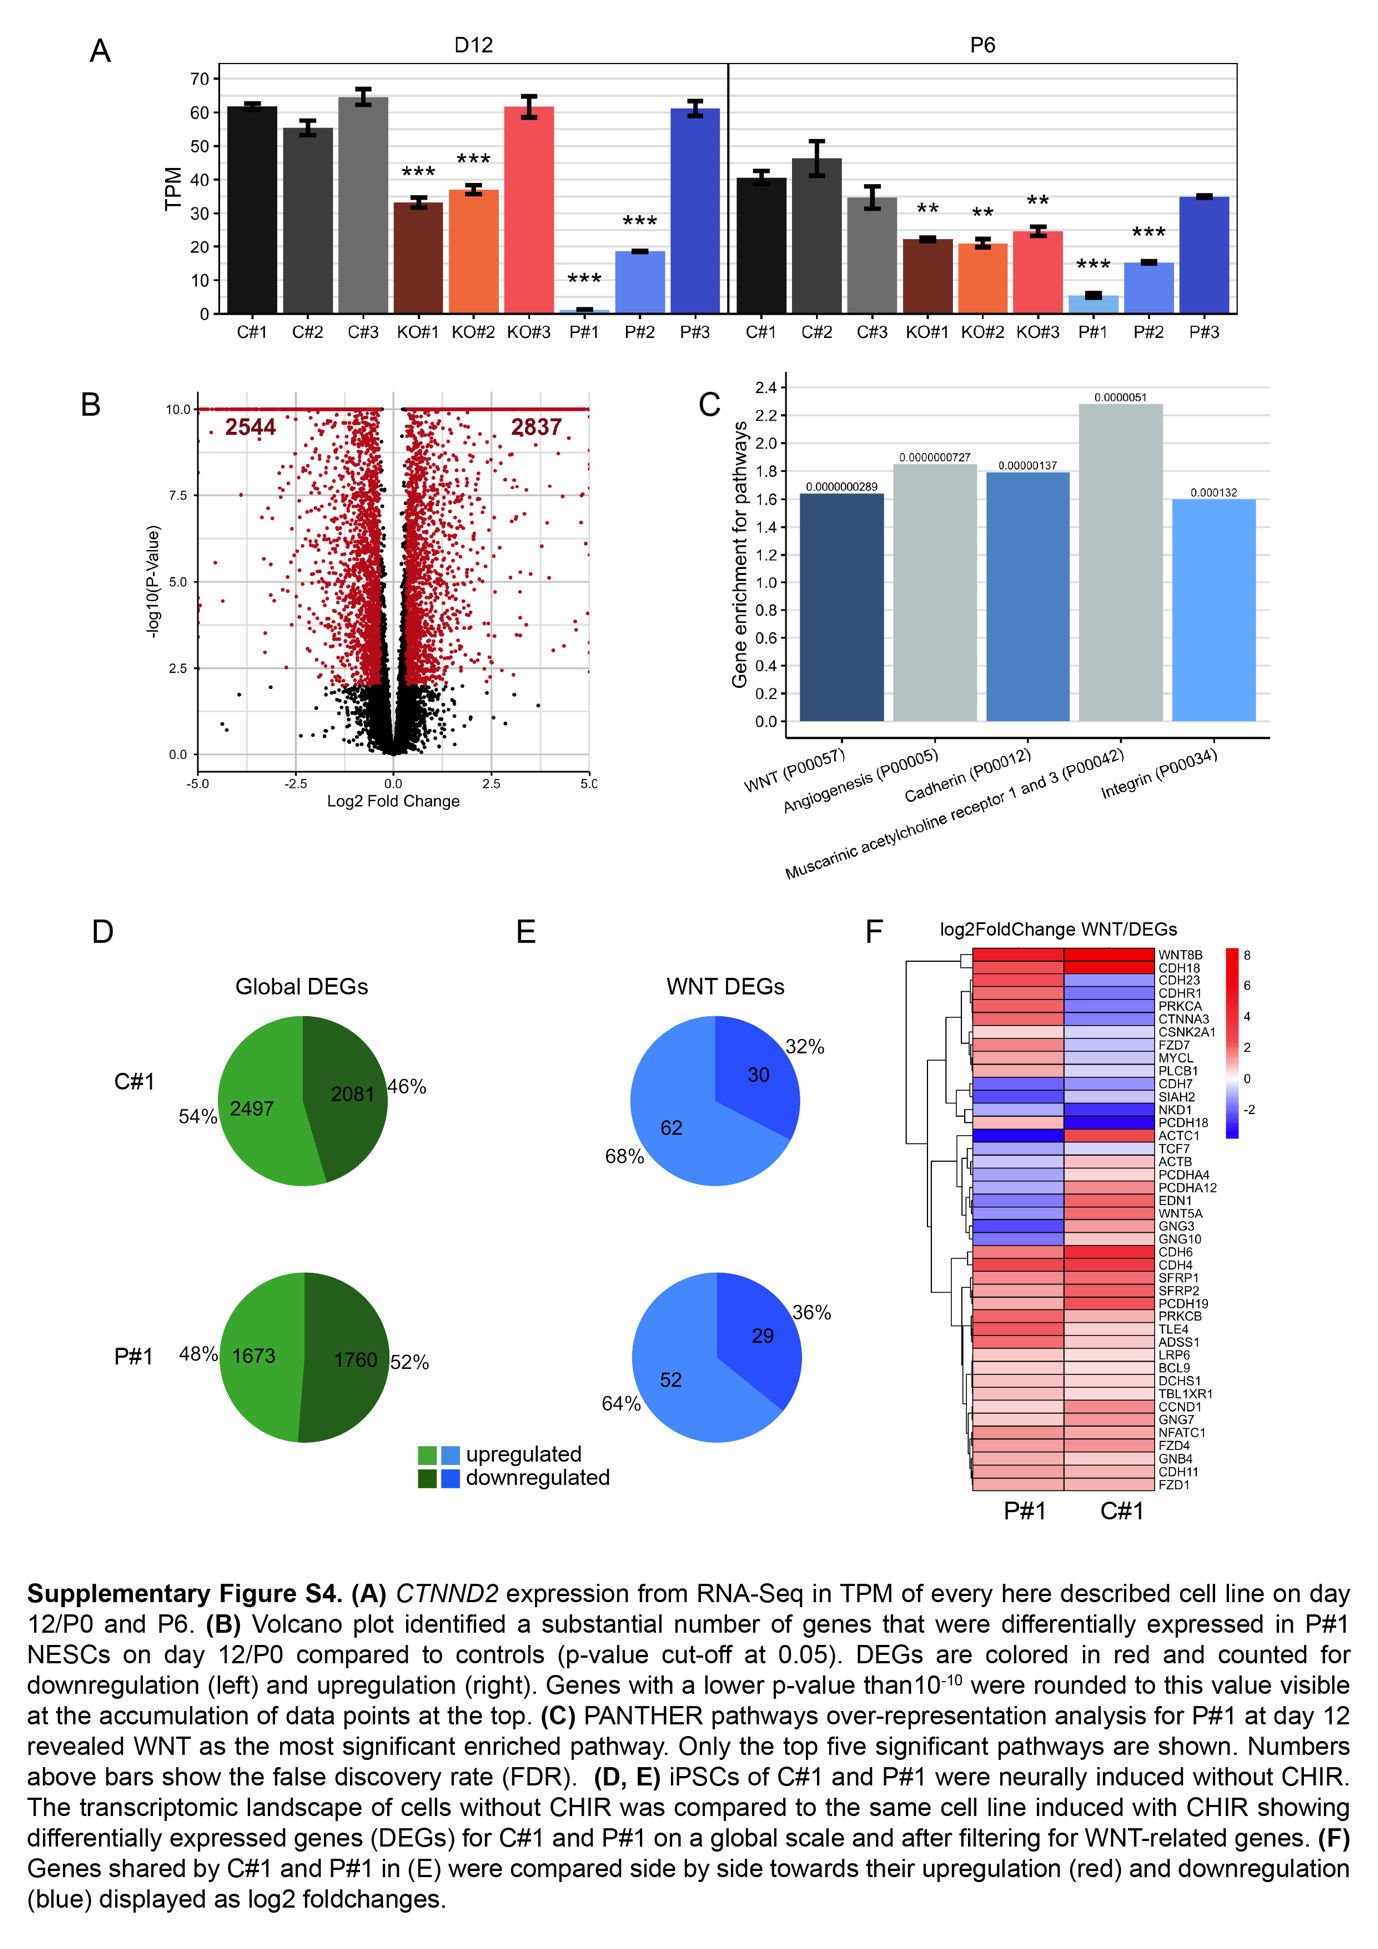


Fig S5

Supplement: Supplementary file 2 [file 8b44e88ff207cbd844d5371f.docx]
